1 **Title:** Interactive Effects of Venlafaxine and Thermal Stress on Zebrafish (*Danio rerio*)  
2 Inflammatory and Heat Shock Responses

3  
4  
5

6 Weber, A.V.<sup>1</sup>, Firth, B.F.<sup>1</sup>, Cadonic, I. G.<sup>1</sup>, Craig, P.M.<sup>1</sup>

7 <sup>1</sup>Department of Biology, University of Waterloo, Waterloo, ON, N2L 3G1, Canada

8 \*Corresponding author: [paul.craig@uwaterloo.ca](mailto:paul.craig@uwaterloo.ca)

9

10

11 **Key words:** cytokines, heat shock proteins, temperature, agitation, CT<sub>max</sub>, zebrafish,

12

13

14

15

16

17

18

19

20

21

22

23

24

25

26 **Summary Statement**

27           This study predicts the effects that climate change and anthropogenic pollutants may have  
28 on fish ability to tolerate elevated temperatures, and examines the physiologic challenges these  
29 stressors may introduce.

30

31 **Abstract**

32 Venlafaxine (VFX), a commonly prescribed antidepressant often detected in wastewater  
33 effluent, and acute temperature elevations from climate change and increased urbanization, are  
34 two environmental stressors currently placing freshwater ecosystems at risk. This study focused  
35 on understanding if exposure to VFX impacts the agitation temperature ( $T_{ag}$ ) and critical thermal  
36 maximum ( $CT_{max}$ ) of zebrafish (*Danio rerio*). Additionally, we examined the interactive effects of  
37 VFX and acute thermal stress on zebrafish heat shock and inflammatory immune responses. A 96  
38 hour 1.0  $\mu\text{g/L}$  VFX exposure experiment was conducted, followed by assessment of thermal  
39 tolerance via  $CT_{max}$  challenge. Heat shock proteins and pro-inflammatory immune cytokines were  
40 quantified through gene expression analysis by quantitative PCR (qPCR) on *hsp 70*, *hsp 90*, *hsp*  
41 *47*, *il-8*, *tnf $\alpha$* , and *il-1 $\beta$*  within gill and liver tissue. No significant changes in agitation temperature  
42 between control and exposed fish were observed, nor were there any differences in  $CT_{max}$  based  
43 on treatment. Unsurprisingly, *hsp 47*, *70*, and *90* were all upregulated in groups exposed solely to  
44  $CT_{max}$ , while only *hsp 47* within gill tissue showed signs of interactive effects, which was  
45 significantly decreased in fish exposed to both VFX and  $CT_{max}$ . No induction of an inflammatory  
46 response occurred. This study demonstrated that environmentally relevant concentrations of VFX  
47 have no impact on thermal tolerance performance in zebrafish. However, VFX is capable of  
48 causing diminished function of protective heat shock mechanisms, which could be detrimental to  
49 freshwater fish populations and aquatic ecosystems as temperature spikes become more frequent  
50 from climate change and urbanization near watersheds.

51  
52  
53  
54  
55  
56  
57  
58  
59  
60  
61

## 62 Introduction

63 With the world population close to surpassing 8 billion, the impact of anthropogenic stress  
64 on aquatic environments is a growing concern. Climate and land use changes are increasing water  
65 temperature (Mohajerani et al., 2017; Poesch et al., 2016; Seneviratne et al., 2014; Somers et al.,  
66 2013; Stillman, 2019), and pollutant discharges introduce additional stressors to these  
67 environments (Daughton and Ternes, 1999). These factors culminate in adverse impacts on  
68 freshwater species, particularly those that reside in relatively shallow habitats that are more  
69 susceptible to temperature changes because of lower thermal inertia (Morash et al., 2021).

70 Humans are responsible for the introduction of pharmaceutical and personal care products  
71 (PPCPs) into freshwater ecosystems (Arlos et al., 2015; Daughton and Ternes, 1999; Metcalfe et  
72 al., 2010). PPCPs are a specific class of environmental contaminant that can induce physiological  
73 effects in exposed organisms (Ebele et al., 2017). Venlafaxine (VFX), a known PPCP, is a  
74 commonly prescribed serotonin and norepinephrine reuptake inhibitor (SNRI) often detected  
75 downstream of wastewater treatment plants (WWTPs; (Metcalfe et al., 2010). The medication and  
76 its active metabolite, O-desmethyl venlafaxine (O-VFX), enter the effluent through human  
77 excretion, are released into freshwater ecosystems through WWTP outfall, and persist in aquatic  
78 environments at lower doses of its original prescribed form (Metcalfe et al., 2010). VFX and O-  
79 VFX are of particular interest as several studies have discovered the two to be more abundant than  
80 any other antidepressant in wastewater effluent (Gauvreau et al., 2022; Hodgson et al., 2020;  
81 Metcalfe et al., 2010) and previous work has demonstrated numerous adverse physiologic effects  
82 in exposed species, including decreases in embryo production (Galus et al., 2013), disruptions in  
83 metabolic responses to secondary stressors (Best et al., 2014), decreases in miRNA expression  
84 (Ikert and Craig, 2020), generational impacts on epigenetic responses (Luu et al., 2021), and  
85 reduced survival (Schultz et al., 2011).

86 Environmental contaminants can activate an immune response in exposed animals,  
87 however the influence of VFX specifically is less understood. Preliminary pilot experiments  
88 performed in our lab found a 96-hour 1.0  $\mu$ /L VFX exposure to zebrafish resulted in increased  
89 expression of pro-inflammatory cytokines, *il-8*, *tnf $\alpha$* , *il-1 $\beta$* . (Dawe and Craig, unpublished  
90 observations), which help to initiate and direct inflammatory immune responses. (Semple and  
91 Dixon, 2020; Uribe et al., 2011). Meagre (*Argyrosomus regius*) housed in VFX-spiked water  
92 resulted in promotion of cellular damage in exposed fish, suggesting VFX may possess the

93 potential to initiate an inflammatory immune response (Maulvault et al., 2019). Conversely, VFX  
94 has also been reported to have anti-inflammatory properties, as recent findings have shown several  
95 anti-depressant medications are capable of depressing inflammatory action in mammals  
96 (Hajhashemi et al., 2015; Tynan et al., 2012). Thus, the impact of VFX on fish inflammatory  
97 responses remains unclear, highlighting a need for further study. Here, Il-1 $\beta$  (interleukin 1 $\beta$ ), and  
98 Tnf $\alpha$  (tumor necrosis factor  $\alpha$ ), proinflammatory cytokines responsible for initiating  
99 inflammatory responses, were analyzed along with Il-8 (interleukin 8), a chemokine that functions  
100 to recruit neutrophils and basophils to the site of infection and has been deemed a marker of  
101 immune system activation (Semple & Dixon, 2020).

102 Additionally, several studies have investigated the effects of aquatic contaminants on the  
103 heat shock response in fish, a protective stress mechanism that results in upregulation of heat shock  
104 proteins (Hsp). Hsp's act as molecular chaperones, aiding in protein folding and preventing or  
105 reversing any misfolding that may occur following exposure to stressors like heat, contaminants,  
106 and pathogens (Abdel-Gawad and Khalil, 2013; Lindquist and Craig, 1988; Mitra et al., 2018;  
107 Roberts et al., 2010). In this study, we examined the effects of effluent exposure on the expression  
108 of three Hsp's of interest: Hsp 47, 70, and 90, all of which have previously shown to be affected  
109 by contaminant exposure. One study on catfish (*Rita rita*) found that both Hsp 70 and Hsp 47 were  
110 significantly upregulated in fish sampled from polluted environments compared to their non-  
111 polluted counterparts (Mitra et al., 2018). Similarly, Hsp 90 increased expression in response to a  
112 variety of environmental pollutants across several fish species, such as common carp (*Cyprinus*  
113 *carpio*) and ornate wrasse (*Thalassoma pavo*; (Xing et al., 2015; Zizza et al., 2017). Though  
114 common contaminants in aquatic environments are capable of inducing upregulation of Hsp's, the  
115 effect of VFX alone on Hsp expression has not been examined in fish. A study on rat cell culture  
116 found that exposure to 10  $\mu$ M VFX initially increased expression of Hsp 70, proposing that VFX  
117 may be capable of regulating HSP expression, however this effect has yet to be analyzed in fish  
118 (Yu et al., 2010).

119 In addition to contaminants, the occurrence of extreme heat waves is becoming more  
120 common (Stillman, 2019). These heat waves, in tandem with rainwater runoff from urban heat  
121 islands, can result in acute temperature spikes in freshwater ecosystems (Mohajerani et al., 2017;  
122 Somers et al., 2013; Stillman, 2019). Temperature increases pose a serious threat to poikilothermic  
123 organisms (such as fish) that are incapable of maintaining their internal body temperature,

124 potentially harming physiologic processes (Deutsch et al., 2008; Ficke et al., 2007; Hochachka and  
125 Somero, 2002). The inflammatory immune response is known to be directly modulated by  
126 temperature, with some levels capable of enhancing immune function (Alcorn et al., 2002; Le  
127 Morvan et al., 1997), but supra-optimal levels can diminish appropriate responses (Dominguez et  
128 al., 2004). Elevated temperature can also indirectly impact immune function, as production of  
129 cortisol during stress has immunosuppressive effects (Cortés et al., 2013; Petrovsky, 2001; Tort,  
130 2011). Specific pro-inflammatory cytokines (Tnf $\alpha$ , Il-1 $\beta$ , and Il-8) have previously shown  
131 enhanced expression following temperature elevations; however, considering the immune system  
132 appears to have an optimal temperature range, it is unclear how an acute heat spike may impact  
133 cytokine expression in zebrafish (Perezcasanova et al., 2008; Polinski et al., 2013; Singh et al.,  
134 2008).

135         Temperature increases also induce initiation of the heat shock response. Hsp 47, 70, and  
136 90 have all been reported to be capable of upregulation following acute heat stress (Fangue et al.,  
137 2011; Manzon et al., 2022; Zhang et al., 2014). Fangue et al. determined that Hsp 70 was inducible  
138 in situations of acute thermal stress introduced through Critical Thermal Maximum (CT<sub>max</sub>), a  
139 method of temperature ramping used to determine an organism's thermal tolerance. CT<sub>max</sub> can  
140 provide insight into how contaminant-exposed fish are able to overcome acute changes in  
141 temperature, and was used in this study to gain a better idea on how VFX exposure may influence  
142 fish ability to tolerate additional environmental stressors. Prior exposure experiments have  
143 indicated that pollutants like pesticides can reduce thermal tolerance (Op de Beeck et al., 2017),  
144 yet others have shown that fish from effluent polluted environments had no changes in thermal  
145 tolerance compared to non-polluted sites (Nikel et al., 2021). Although no studies have  
146 investigated VFX impacts on CT<sub>max</sub>, WWTP effluent can increase oxygen consumption which  
147 could potentially manifest as limitations in handling higher temperatures (Mehdi et al., 2018).  
148 Drawing inspiration from Fangue et al. (2011), CT<sub>max</sub> was utilized in this project to assess for  
149 thermal tolerance and also as a method of inducing acute thermal stress to investigate the  
150 inflammatory and heat shock response after VFX exposure.

151         Environmental stressors are rarely experienced individually, rather, combinations of  
152 stressors can result in exacerbated effects of pollutants, specifically in the presence of elevated  
153 temperature. Thermal stress increases metabolic rate in fishes, increasing ventilation and  
154 ultimately increasing exposure levels to toxic contaminants (Cairns et al., 1975; Maulvault et al.,

155 2018). This is especially true for effluent-derived contaminants considering that WWTP effluent  
156 has been shown to cause thermal enhancement near discharge sites (Environment Canada, 2001;  
157 Mehdi et al., 2019). Furthermore, since most WWTPs are located in urban centers, warmed  
158 rainwater runoff due to the heat island effect can lead to acute temperature spikes in effluent  
159 polluted waters (Mohajerani et al., 2017; Somers et al., 2013). Climate change will exacerbate this  
160 effect further due to increased frequency and severity of heat waves (Seneviratne et al., 2014;  
161 Stillman, 2019). Thus, knowing how temperature spikes will interact with contaminants is  
162 imperative for aquatic species. It is therefore necessary that multiple interacting stressors be  
163 studied in order to accurately represent aquatic environments and gain a better understanding of  
164 the dangers these interactions may pose to aquatic ecosystems. This study attempts to understand  
165 if VFX exposure impacts zebrafish thermal tolerance and investigates if exposure to both acute  
166 thermal stress and VFX have interactive effects on the heat shock and inflammatory immune  
167 responses of zebrafish. We hypothesized that VFX-exposed fish would have decreased ability to  
168 tolerate higher temperatures, and predicted that fish exposed to both VFX and thermal stress would  
169 have increased levels of heat shock proteins and inflammatory cytokines.

## 170 **Materials and Methods**

### 171 *Experimental Design*

172 Adult zebrafish of mixed sex were obtained from a local supplier (Big Al's Kitchener,  
173 Ontario, Canada) and held in a recirculating Z-HAB system (Pentair Aquatic Eco-Systems Inc.,  
174 Apopka, Florida, USA). Tanks were maintained at 27° C, pH 7.5, and conductivity of ~670 µS,  
175 under 12-hour light dark cycles. All experiments performed in this study were in accordance with  
176 the Canadian Council of Animal Care guidelines as reviewed by the University of Waterloo  
177 Animal Care Committee (AUP #40989).

178 An acute 96-hour VFX exposure experiment was designed with two treatment groups: an  
179 exposed group spiked with 1.0 µg/L of VFX and a non-exposed control group (Figure 1). Zebrafish  
180 of mixed sex were transferred to a 15 L glass tank with three tank replicates per treatment. Tanks  
181 were oxygenated via air stone, continuously filtered, and held at 27° C for fish to acclimate for 3  
182 days prior to exposure. At the start of the exposure, aquarium filters were removed and VFX  
183 (Millipore-Sigma-Aldrich, Oakville, Ontario, Canada) was introduced into the exposed group  
184 tanks at a concentration of 1.0 µg/L. This concentration was chosen because VFX levels in effluent  
185 exposed waters can reach 1.0 µg/L and has been previously shown to impact transcript levels in

186 fish (Gauvreau et al., 2022; Luu et al., 2021; Metcalfe et al., 2010). Throughout the experiment,  
187 fish were fed Gemma 300 (Skretting, Westbrook, Maine, USA) to satiety once daily followed by  
188 a 50% water change 1 hour after feeding to minimize nitrogenous waste build-up. Following daily  
189 water changes, re-addition of VFX was dosed to maintain an overall concentration of 1.0 µg/L.  
190 Water quality parameters (pH, Nitrite, Nitrate, and Ammonia) were checked 1 hour after VFX  
191 dosage using a Freshwater Master Test Kit (API, Chalfont, Pennsylvania, USA). Upon completion  
192 of the 96 hours, thermal tolerance was measured in a subset of fish from each tank. The remaining  
193 fish were euthanized using buffered 0.5 g/L MS-222 and sampled to serve as a non-heat exposed  
194 baseline. Length, weight, and sex of each fish were recorded, and gill and liver tissue were  
195 dissected, immediately frozen on dry ice, and stored in individual cryotubes at -80° C until further  
196 use. Based on this study design, 4 experimental groups were established: control/no CT<sub>max</sub> fish  
197 referred to as control baseline, control/CT<sub>max</sub> fish referred to as control-heat, VFX/no CT<sub>max</sub> fish  
198 referred to as VFX baseline, and VFX/CT<sub>max</sub> fish referred to as VFX-heat (Figure 1).

#### 199 *VFX Quantification*

200 Twice over the course of the 96 hours, water samples were taken from each treatment tank  
201 to confirm VFX concentrations and lack of VFX in control tanks. Samples were collected at least  
202 1 hour after daily VFX re-spiking and stored in amber glass bottles at -20 ° C until analysis.  
203 Analysis of samples was conducted according to the protocol described in Luu et al. (2021). VFX  
204 was quantified through solid phase extraction (SPE) in Oasis HLB cartridges (6cc, 500 mg, Waters  
205 Corporation, Milliford, Massachusetts, USA) followed by liquid chromatography and tandem  
206 mass spectrometry using a Sciex API 32000 QTRAP LC-MS/MS system (ABSciex; Concord,  
207 Ontario, Canada). The method detection limit (MDL) in a 500 mL samples is 1/ng/L. 100 mL  
208 samples were extracted in this experiment, so the detection limit was calculated to be 5 ng/L based  
209 on the original MDL.

#### 210 *Assessment of Thermal Tolerance*

211 Once the 96-hour VFX exposure had completed, zebrafish from each treatment underwent  
212 an assessment of thermal tolerance determined via CT<sub>max</sub>. Fish were fasted 24 hours prior to the  
213 CT<sub>max</sub> procedure. For the CT<sub>max</sub> trials, 5 zebrafish were transferred to a breeder box placed within  
214 a 30 L glass aquarium and left to acclimate for 15 minutes at 27°C. After acclimation, temperature  
215 was increased by 0.33°C per minute using a Julabo portable immersion circulator (Julabo,  
216 Seelbach, Baden-Württemberg, Germany). Fish behavior was visually monitored, specifically



217 examining for agitation temperature ( $T_{ag}$ ) and loss of equilibrium (LOE). Agitation temperature  
218 was marked as the temperature at which fish appear to become distressed and begin to take on  
219 more erratic swimming behaviors in an attempt to search for cooler waters (McDonnell and  
220 Chapman, 2015). LOE is the point at which thermal tolerance is reached; at this temperature fish  
221 cannot maintain their position in the water column and go belly up (Becker and Genoway, 1979).  
222 Upon observation of agitation behavior and LOE, temperature of occurrence was recorded. Fish  
223 that had reached their thermal maximum were placed into a holding tank of 27°C, 0.0 µg/L VFX  
224 for a 1-hour depuration period to allow time to mount a heat shock response, as adapted from  
225 the methods used in Fanguie et al., 2011. Euthanasia and sampling of gills and liver was conducted  
226 using the same method utilized on baseline fish. No mortalities occurred due to the  $CT_{max}$   
227 procedure. All trials were recorded via GoPro and re-watched to confirm agitation and LOE  
228 temperatures. Experimental film was analyzed blindly, through randomized sorting and renaming  
229 of video files performed by a simple Python script. The percent of fish displaying signs of  
230 temperature agitation, and percent reaching LOE were recorded at specific temperature points as  
231 it increased incrementally. Temperature was log transformed and plotted with either the  
232 percentages of agitation or LOE as a dose response curve to determine the EC50 value for each  
233 treatment (Figure 3A).

#### 234 *Tissue Analysis*

235 Liver and gill tissue RNA were extracted following Craig et al. (2013). Per 100 mg of  
236 tissue, 1 mL of Trizol (Sigma-Aldrich, Oakville, Ontario, Canada) was added and homogenized  
237 by an OMNI TH handheld tissue homogenizer (Kennesaw, Georgia, USA). Chloroform was added  
238 to the Trizol-tissue solution and samples were centrifuged to separate the two liquid layers.  
239 Supernatants were removed and precipitated with 100% isopropyl alcohol. Again, samples were  
240 centrifuged. The remaining precipitate was washed and centrifuged with 75% EtOH twice. EtOH  
241 was removed and samples were pulse spun and air dried to ensure the pellet had no trace EtOH.  
242 Samples were reconstituted in water. RNA concentration was quantified using a SpectraMax 190  
243 (San Jose, California, USA) and 500 ng of RNA was used for cDNA synthesis, using a Qiagen  
244 QuantiTect Reverse Transcription kit (Hilden, North-Rhine Westphalia, Germany). cDNA  
245 samples were stored at -20° C until subsequent analysis. The relative expression levels of the  
246 genes: *hsp 70*, *hsp 90*, *hsp 47*, *il-8*, *tnfα*, *il-1β*, (Table 1) were determined using quantitative PCR  
247 on a BioRad CFX96 Touch Thermal Cycler (Hercules, California, USA) with a sample size of n

248 = 6 fish per treatment derived from one tank exposure replicate (n = 5 for VFX baseline in liver  
249 tissue due to RNA concentration being too low). Each reaction contained 2  $\mu$ L of diluted cDNA,  
250 5  $\mu$ L of BioRad SYBR Green Master Mix, 1  $\mu$ L of forward and reverse primers, and 1  $\mu$ L of water.  
251 cDNA was incubated at 95° C for 30 s, denatured at 95° C for 10 s, and annealed at 60° C for 20  
252 s. Fluorescence was then detected and followed by 39 more denaturation and annealing cycles.  
253 Gene expression was normalized to several housekeeping genes:  *$\beta$ -actin* and ribosomal protein  
254 subunit (*rps 18*) for gill samples, and  *$\beta$ -actin* and *ef1a* for liver, all of which were deemed stable  
255 between treatment groups (Table 2).

### 256 *Statistical Analysis*

257 All statistical analyses were performed by GraphPad Prism 8.1.2 using a p value cutoff of  
258 0.05 (GraphPad, San Diego). An independent t-test was completed to assess for any significant  
259 differences in the CT<sub>max</sub> values of VFX-exposed and non-exposed. Dose response curves were  
260 created for both agitation temperature and LOE with incremental temperature increases as dosage  
261 and percent agitated or percent LOE as response. EC50 values were determined and used in an  
262 independent samples t-test to compare for any significant differences in 50% agitation temperature  
263 and 50% LOE between exposed and non-exposed treatment groups. For all CT<sub>max</sub> data, individual  
264 data points were averaged within each experimental replicate and analyses were conducted  
265 between replicate averages. Hsp's and pro-inflammatory cytokine gene expression data were log-  
266 transformed to pass normality testing for parametric statistics (gill *hsp 90* expression was normally  
267 distributed and therefore was not log-transformed). Significant changes in expression were  
268 determined via Two-Way Analysis of Variance (ANOVA) followed by a Tukey post hoc test to  
269 analyze for interactive effects of VFX exposure and acute thermal stress.

## 270 **Results**

### 271 *Water Quality*

272 Venlafaxine quantification analyses ran on control and VFX exposed water samples  
273 confirmed control tanks to have an average of 0.0  $\mu$ g/L of VFX and exposure tanks 1.076  $\pm$   
274 0.020  $\mu$ g/L, with values presented as mean  $\pm$  SEM.

### 275 *Agitation Temperature and Critical Thermal Maximum*

276 Thermal tolerance was not significantly different (t-test,  $t_4 = 0.8489$ ,  $P = 0.4438$ ) between  
277 VFX-exposed (41.25° C  $\pm$  0.13) and non-exposed (40.93° C  $\pm$  0.36) treatment groups (Figure 2).  
278 VFX exposed fish (EC50 34.00° C ) showed signs of temperature agitation 0.68 ° C earlier than

279 control fish (EC50 34.68° C). Conversely, LOE was reached 0.20° C earlier in control fish (EC50  
280 41.02° C) than VFX-exposed (EC50 41.22° C). No significant differences were seen between  
281 control and VFX EC50 values in either agitation temperature (t-test,  $t_4 = 1.251$ ,  $p = 0.2790$ ) or  
282 LOE (t-test,  $t_4 = 1.294$ ,  $p = 0.2652$ ; Figure 3B).

### 283 *RT-qPCR Gene Expression Analysis*

284 All pro-inflammatory cytokine expression in liver tissue was not significantly different  
285 between treatment group (Two-Way ANOVA,  $p > 0.05$ ), heat exposure (Two-Way ANOVA,  $p >$   
286  $0.05$ ), or the interaction term between treatment group and heat exposure (Two-Way ANOVA,  $p$   
287  $> 0.05$ ; Table S1; Figure 4A). Similarly in gill tissue, pro-inflammatory cytokine expression was  
288 not significantly different between treatment group (Two-Way ANOVA,  $p > 0.05$ ), heat exposure  
289 (Two-Way ANOVA,  $p > 0.05$ ) or the interaction term between treatment group and heat exposure  
290 (Two-Way ANOVA,  $p > 0.05$ ; Table S2; Figure 4B).

291 Within liver tissue all hsp's were significantly upregulated in zebrafish that underwent a  
292  $CT_{max}$  thermal challenge, regardless of exposure group (Figure 5A). *Hsp 70* was significantly  
293 different between heat exposure (Two-Way ANOVA,  $F_{1,19} = 317.7$ ,  $p = < 0.0001$ ) while treatment  
294 group (Two-Way ANOVA,  $F_{1,19} = 0.007899$ ,  $p = 0.9301$ ) and the interaction between treatment  
295 group and heat exposure was not significantly different (Two-Way ANOVA,  $F_{1,19} = 0.1702$ ,  $p =$   
296  $0.6845$ ; Figure 5A). *Hsp 70* elicited the greatest upregulation out of all examined hsp's, increasing  
297 by about 2,000 fold between control baseline and control-heat fish, and then roughly 1,000 fold  
298 VFX baseline and VFX-heat fish (Tukey HSD,  $p < 0.0001$ ;  $p < 0.001$ ). Likewise, *hsp 90* was  
299 significantly different between heat exposure (Two-Way ANOVA,  $F_{1,19} = 276.4$ ,  $p = < 0.0001$ ).  
300 Treatment group (Two-Way ANOVA,  $F_{1,19} = 0.2212$ ,  $p = 0.6435$ ) and the interaction between  
301 treatment group and heat exposure were not significantly different (Two-Way ANOVA,  $F_{1,19} =$   
302  $0.006506$ ,  $p = 0.9366$ ; Figure 5A). Expression of *hsp 90* increased 500 fold in control-heat and 300  
303 fold in VFX-heat exposed fish (Tukey HSD,  $p < 0.0001$ ;  $p < 0.001$ ). *Hsp 47* also was significantly  
304 different between heat exposure (Two-Way ANOVA,  $F_{1,19} = 59.3$ ,  $p = < 0.0001$ ) with no  
305 significant differences observed between treatment group (Two-Way ANOVA,  $F_{1,19} = 0.2109$ ,  $p$   
306  $= 0.6513$ ) and the interaction between treatment group and heat exposure (Two-Way ANOVA,  
307  $F_{1,19} = 1.891$ ,  $p = 0.1851$ ; Figure 5A). *Hsp 47* appeared to have a more minor, but still significant  
308 increase with expression increasing more than 20 fold following thermal challenge in control group  
309 fish and 8 fold in the VFX-heat treatment group (Tukey HSD;  $p < 0.0001$ ;  $p = 0.0017$  respectively).

310 Similar patterns were noted in gill *hsp 70* and *hsp 90* expression; both significantly  
311 increased in all fish exposed to  $CT_{max}$  (Two-Way ANOVA,  $F_{1,20} = 8.559$ ,  $p = 0.0084$ ; Two-Way  
312 ANOVA,  $F_{1,20} = 99.93$ ,  $p = < 0.0001$  respectively; Figure 5B). Furthermore, both the treatment  
313 group (Two-Way ANOVA,  $F_{1,20} = 2.215$ ,  $p = 0.1523$ ; Two-Way ANOVA,  $F_{1,20} = 0.09774$ ,  $p =$   
314  $0.7578$  respectively) and the interaction between treatment group and heat exposure were not  
315 significantly different in neither *hsp 70* or *hsp 90* (Two-Way ANOVA,  $F_{1,20} = 2.215$ ,  $p = 0.1523$ ;  
316 Two-Way ANOVA,  $F_{1,20} = 0.09573$ ,  $p = 0.7602$  respectively; Figure 5B). Expression of *hsp 70* in  
317 gill tissue increased ~800 fold in control-heat and ~700 fold in VFX-heat fish (Tukey HSD,  $p <$   
318  $0.001$ ;  $p < 0.001$ ). Expression of *hsp 90* saw ~250 fold increase in fish exposed to control-heat and  
319 ~300 fold increase in VFX-heat fish (Tukey HSD,  $p < 0.001$ ;  $p < 0.001$ ). It is noteworthy that *hsp*  
320 *47* was the only gene of interest examined in the study that showed interactive effects between  
321 acute heat stress and VFX exposure (Two-Way ANOVA,  $F_{1,20} = 4.984$ ,  $p = 0.0372$ ). Expression  
322 of *hsp 47* was significantly reduced by approximately 60% in VFX-heat compared to control-heat  
323 fish (Tukey HSD,  $p = 0.0293$ ). Within control fish, expression was upregulated roughly 4 fold in  
324 control heat fish (Tukey HSD,  $p = 0.0119$ ); in VFX-exposed fish, no significant differences were  
325 observed between VFX baseline and VFX-heat (Tukey HSD,  $p = 0.9891$ ). Overall, for both gill  
326 and liver tissue, exposure to VFX alone did not induce a heat shock response in any of the *hsp*'s.

## 327 **Discussion**

328 This study aimed to determine if VFX exposure impacts fish thermal tolerance and alters  
329 the heat shock and inflammatory immune responses to acute thermal stress in zebrafish. We  
330 demonstrated that a 96-hour exposure to an environmentally relevant concentration of VFX is not  
331 sufficient in decreasing zebrafish thermal tolerance. Neither VFX,  $CT_{max}$ , nor interaction of the  
332 two, were found to have significant impacts on expression of pro-inflammatory cytokines.  
333 However,  $CT_{max}$  was capable of inducing upregulation of all *hsp* transcripts measured and it was  
334 found that VFX dampened the heat shock responses, as seen as lowered *hsp 47* expression levels  
335 in gill tissue.

### 336 *1.0 Thermal Tolerance*

337 VFX exposure did not alter thermal tolerance as no significant differences were seen  
338 between the temperatures at which agitation and LOE occurred between VFX-exposed and non-  
339 exposed fish (Figures 2 & 3). It is possible that the environmentally relevant concentration of 1.0  
340  $\mu\text{g/L}$  or the 96-hour exposure period simply are not enough to introduce significant physiological

341 changes that would present adverse effects on fish thermal tolerance. Our findings here coincide  
342 with similar studies that assessed the impacts of contaminated environmental sites on  $CT_{max}$   
343 performance (Jayasundara et al., 2017; Nikel et al., 2021). Though both Jayasundara et al. (2017)  
344 and Nikel et al. (2021), observed other changes caused by exposure to contaminants, including  
345 alterations in body size, mitochondrial function and metabolic processes, no changes in  $CT_{max}$   
346 between exposed and non-exposed treatment groups occurred in either study. Thus, while VFX  
347 may be capable of inducing alternate physiological changes (Best et al., 2014; Ikert and Craig,  
348 2020; Mehdi et al., 2019), it can be concluded that these effects are not sufficient to result in  
349 decreased ability to tolerate warming waters.

350 One challenge of the assessment of thermal tolerance was determining the points of  
351 agitation temperature. Considering that zebrafish are a pelagic species and often swim erratically  
352 under normal, non-stressed conditions, pinpointing the onset of agitation proved to be difficult. A  
353 blind assessment of each trial was utilized to mitigate bias; however, it is still possible that the  
354 assessment of agitation performed in this study may not be representative of when individual fish  
355 experienced thermally-induced agitation. Comparison of agitation temperature between exposure  
356 groups was of particular interest considering that it is a behavioral measure that could be impacted  
357 in fish exposed to an antidepressant medication with known neurological effects (Gauvreau et al.,  
358 2022). Numerous studies have implied VFX's role in behavioral changes like predation behavior  
359 and escape responses in fish, so additional studies on VFX-induced behavioral impacts specifically  
360 relating to temperature tolerance is worth further investigation (Bisesi et al., 2014; Painter et al.,  
361 2009). Although no significant conclusions were drawn here, studying a benthic species would be  
362 advantageous in effectively elucidating the impact of VFX exposure on agitation temperature.

## 363 *2.0 Inflammatory Response*

364 It is unlikely that VFX and acute heat stress have any serious inflammatory impacts on  
365 zebrafish considering that no changes were observed in pro-inflammatory cytokine expression in  
366 both gill and liver tissue across all treatment groups. Surprisingly, VFX alone presented no  
367 inflammatory effects. Previous studies have shown that environmentally relevant concentrations  
368 of other PPCPs, specifically (non-steroidal anti-inflammatory drugs) NSAIDs and ibuprofen were  
369 capable of inducing inflammatory responses and increasing cytokine production within exposed  
370 fish (Hoeger et al., 2005; Zhang et al., 2021). Likewise, 1.0  $\mu\text{g/L}$  VFX exposure in various darter  
371 species (*Etheostoma* spp.) caused significant upregulation of *il-6* and *caspase 9*, pro-inflammatory

372 and apoptotic markers, in the gill (Dawe et al., under review). However, these differences were  
373 relatively subdued (2-fold) compared to a true inflammatory response. An active immune response  
374 would be expected to result in cytokine upregulations of more than 100 fold (Commins et al., 2010;  
375 Zou and Secombes, 2016). Considering that no significant changes in pro-inflammatory cytokine  
376 expression occurred in the current study following VFX exposure, and the recent darter studies  
377 found only 2-fold increases, it appears that the environmentally relevant concentration of 1.0 ug/L  
378 VFX alone is not sufficient to induce an active inflammatory response in zebrafish.

379 All immune transcripts (*il-1 $\beta$* , *il-8*, *tnfa*) were unaffected by the acute temperature stress  
380 (Figure 4). However, previous studies have shown that acute heat stress can induce short term  
381 immune enhancement (Tort, 2011). It is particularly interesting that the pro-inflammatory  
382 cytokines within this study did not follow this trend. It is plausible that the lack of significance in  
383 upregulation observed in heat groups may be due to the 1-hour depuration period that followed  
384 CT<sub>max</sub>. Cytokine responses to acute stressors are known to have a shorter half-lives compared to  
385 those activated in response to chronic stressors (Tort, 2011). Therefore, cytokine expression could  
386 have returned to control levels by the time sampling occurred. Further, heat has been shown to  
387 enhance the inflammatory immune response, often having synergistic effects when experienced in  
388 addition to an inflammatory stimulant like lipopolysaccharide (LPS; (Polinski et al., 2013; Tort,  
389 2011). Considering that VFX had no impact on the immune transcripts measured, it is not  
390 surprising that the introduction of acute heat shock, or the interaction between heat and VFX,  
391 caused no additional upregulation of cytokines. To better understand impact of VFX, temperature,  
392 and the interactive effects of the two on inflammation, a live pathogen challenge would be a more  
393 effective approach to elucidate how these stressors may be influencing the inflammatory immune  
394 response.

### 395 *3.0 Heat Shock Response*

396 While numerous studies have investigated the impacts of aquatic contaminants on Hsp  
397 expression, few have illustrated the effect of effluent-derived contaminants, specifically VFX. As  
398 expected, Hsp expression increased drastically in both liver and gill after acute temperature  
399 increases, affirming similar results presented in Fanguie et al (2011), that deemed CT<sub>max</sub> capable  
400 of inducing a heat shock response. Examination of the interactive effects of VFX exposure and  
401 acute thermal stress found that VFX may diminish the heat shock response, as *hsp 47* within gill  
402 tissue was unaffected by CT<sub>max</sub> (Figure 5). This result is concerning considering that the gill is

403 indirect contact with the environment and has important roles in regulating oxygen transport; a  
404 VFX-induced dampened heat shock response could introduce harmful physiologic effects relating  
405 to complications in oxygen uptake, such as decreased oxygen transport ability and thus reduced  
406 oxygen delivery to tissues. It is unclear why only *hsp 47*, localized only within the endoplasmic  
407 reticulum and functioning specifically in collagen folding and assembly, showed interactive effects  
408 and not *hsp 90* or *70*, which are implicated in more general protein folding and expressed  
409 ubiquitously (Iwama et al., 1999; Zhang et al., 2014). Furthermore, the physiological implications  
410 of this dampened expression should be investigated further to identify if VFX impacts collagen  
411 folding after heat stress. Previous work has suggested that there are different regulatory  
412 mechanisms behind *hsp 70* and *47*, however the specifics underlying these differences and why  
413 one chaperone might be impacted by VFX exposure and not the other remain unknown (Lele et  
414 al., 1997). Similarly, VFX's method of dampening hsp expression in this study is unclear. Yu et  
415 al (2010) has postulated that VFX may be capable of causing translocation of glucocorticoid  
416 receptors into the nucleus which could result in inhibition of heat shock factor (HSF), a  
417 transcription factor that controls expression of heat shock proteins, ultimately preventing the  
418 formation of an appropriate heat shock response. However, this provides no insight into why  
419 expression of some hsp's and not others may be impacted by VFX. Studies utilizing different  
420 concentrations of VFX could provide insight into whether this antidepressant modulates heat shock  
421 responses. As well, the reasoning behind why *hsp 47* expression is sensitive to VFX is puzzling  
422 and requires further investigation.

#### 423 *4.0 Conclusions*

424 Collectively, this study demonstrated that environmentally relevant concentrations of VFX  
425 have no impact on thermal tolerance performance in zebrafish. Furthermore, VFX, and interaction  
426 between VFX and acute thermal stress present no induction of an inflammatory immune response.  
427 VFX is capable of causing diminished function of protective heat shock mechanisms which could  
428 prove to be detrimental to freshwater fish populations and aquatic ecosystems as temperature  
429 spikes become more frequent from climate change and increased urbanization near watersheds.

#### 430 **Acknowledgments**

431 The authors would like to thank Leslie Bragg and the Servos Lab for assistance with VFX  
432 quantification, and Neil Brubacher for creation of the Python script used in blind video analysis.

433 Experimental design graphic was created with BioRender.com. This research was funded through  
434 a Natural Sciences and Engineering Research Council (NSERC) Discovery Grant to PMC.  
435



436 **Table 1:** mRNA primers of genes of interest used for RT-qPCR. All primer sequences are listed  
 437 in the 5' to 3' direction with F representing forward and R reverse primers.

438  
 439

| Target                          | Amplicon | Accession #  | Efficiency                  | M Score                     | Primer Sequence                                       |
|---------------------------------|----------|--------------|-----------------------------|-----------------------------|-------------------------------------------------------|
| <i>hsp 90</i>                   | 100 BP   | BC134081     | Liver: 97.7<br>Gill: 105.1  | N/A                         | F: CACGATCATGGCGATAAGTG<br>R: ACAGCGGTTTGGTTTTGTTC    |
| <i>hsp 70</i>                   | 127 BP   | AF210640.1   | Liver: 99.2<br>Gill: 95.1   | N/A                         | F: AAAGCACTGAGGGACGCTAA<br>R: TGTTCAAGTTCTCTGCCGTTG   |
| <i>hsp 47</i>                   | 91 BP    | NM_131204.2  | Liver: 99.1<br>Gill: 102.8  | N/A                         | F: GTCAGCCACGACCTTCAGAA<br>R: TGCCGGAAATGTTGGACAGA    |
| <i>il-1<math>\beta</math></i>   | 150 BP   | NM_212844    | Liver: 96.6<br>Gill: 110.4  | N/A                         | F: TGGACTTCACGCTCTTGGATG<br>R: GTTCACTTCACGCTCTTGGATG |
| <i>il-8</i>                     | 158 BP   | XM_009306855 | Liver: 98.2<br>Gill: 103.1  | N/A                         | F: GTCGCTGCATTGAAACAGAA<br>R: CTTAACCCATGGAGCAGAGG    |
| <i>tnf<math>\alpha</math></i>   | 76 BP    | NM_212859.2  | Liver: 107.4<br>Gill: 102.9 | N/A                         | F: CCATGCAGTGATGCGCTTTT<br>R: CGTGCAGATTGAGCGGATTG    |
| <i>rps-18</i>                   | 111 BP   | NM_173234    | Liver: 93.7<br>Gill: 95.5   | Liver: 0.538<br>Gill: 0.889 | F: GAGGTTGAGAGGGTGGTGAC<br>R: AAGGACCTGGCTGTATTTCCC   |
| <i><math>\beta</math>-actin</i> | 80 BP    | NM_131031.2  | Liver: 101.3<br>Gill: 92.6  | Liver: N/A<br>Gill: 0.889   | F: TCCATTGTTGGACGACCCAG<br>R: TGGGCCTCATCTCCACATA     |
| <i>efl<math>\alpha</math></i>   | 107 BP   | NM_131263    | Liver: 97.8<br>Gill: N/A    | Liver: 0.538<br>Gill: N/A   | F: CAAGGAAGTCAGCGCATACA<br>R: TCTTCCATCCCTTGAACCAG    |

440  
 441

442 **Figure 1: Graphical representation of experimental design.** A 96-hour exposure experiment  
443 was conducted with two treatment groups: a 1.0 µg/L VFX exposed group and a non-exposed  
444 control. Upon completion of the 96 hours, thermal tolerance was measured in the control heat and  
445 VFX heat experimental groups. The remaining fish were euthanized to serve as a control baseline  
446 and VFX baseline. All groups had liver and gill tissue sampled and expression of hsp's and pro-  
447 inflammatory cytokines was determined via qPCR.

448  
449 **Figure 2: Critical thermal maximum of zebrafish from control and VFX-exposed treatment**  
450 **groups.** Different letters denote significant differences between groups ( $p < 0.05$ ;  $n = 3$ . Individual  
451 data points are shown for each exposure replicate  $CT_{max}$  average and bars represent mean  $\pm$   
452 standard error.

453  
454 **Figure 3: Percent of fish displaying signs of agitation and reaching LOE at specific**  
455 **temperature increments.** Recorded following a blind review of the  $CT_{max}$  experiment on film,  
456 temperature points were log transformed and plotted a dose response curve in order to determine  
457 the point of 50% agitation and 50% LOE for each treatment (A) ( $n = 3$  exposure replicates).  
458 Temperature agitation, control fish:  $EC_{50}$  34.68° C, VFX exposed fish:  $EC_{50}$  34.00° C. LOE  
459 control fish:  $EC_{50}$  41.02° C, VFX exposed fish:  $EC_{50}$  41.22° C. Dots represent temperature points  
460 at which percentages were recorded.  $EC_{50}$  values of agitation temperature and LOE were analyzed  
461 using an independent samples t-test (B) ( $p < 0.05$ ,  $n = 3$  exposure replicates).

462  
463 **Figure 4: Pro-inflammatory cytokine gene expression.** The relative gene expression (mean  $\pm$   
464 SEM) of *il-8*, *tnf $\alpha$* , and *il-1 $\beta$* , in zebrafish liver (A) and gill (B) in either control or VFX-exposed  
465 fish followed by either presence or absence of  $CT_{max}$  thermal challenge. Bars with differing  
466 symbols show significant differences between them as determined by a Two-Way ANOVA with  
467 Tukey's post hoc test ( $p < 0.05$ ;  $n = 6$ ). Dots represent individual data points. Gene expression  
468 figures are presented as untransformed data for clarity.

469  
470 **Figure 5: Heat shock protein gene expression.** The relative gene expression (mean  $\pm$  SEM) of  
471 *hsp 70*, *hsp 90*, and *hsp 47* in zebrafish liver (A) and gill (B) in either control or VFX-exposed fish  
472 followed by either presence or absence of  $CT_{max}$  thermal challenge. Bars with differing symbols  
473 show significant differences between them as determined by a Two-Way ANOVA with Tukey's

474 post hoc test ( $p < 0.05$ ;  $n = 6$ ). Dots represent individual data points. Gene expression figures are  
475 presented as untransformed data for clarity.

476

477

478  
479  
480

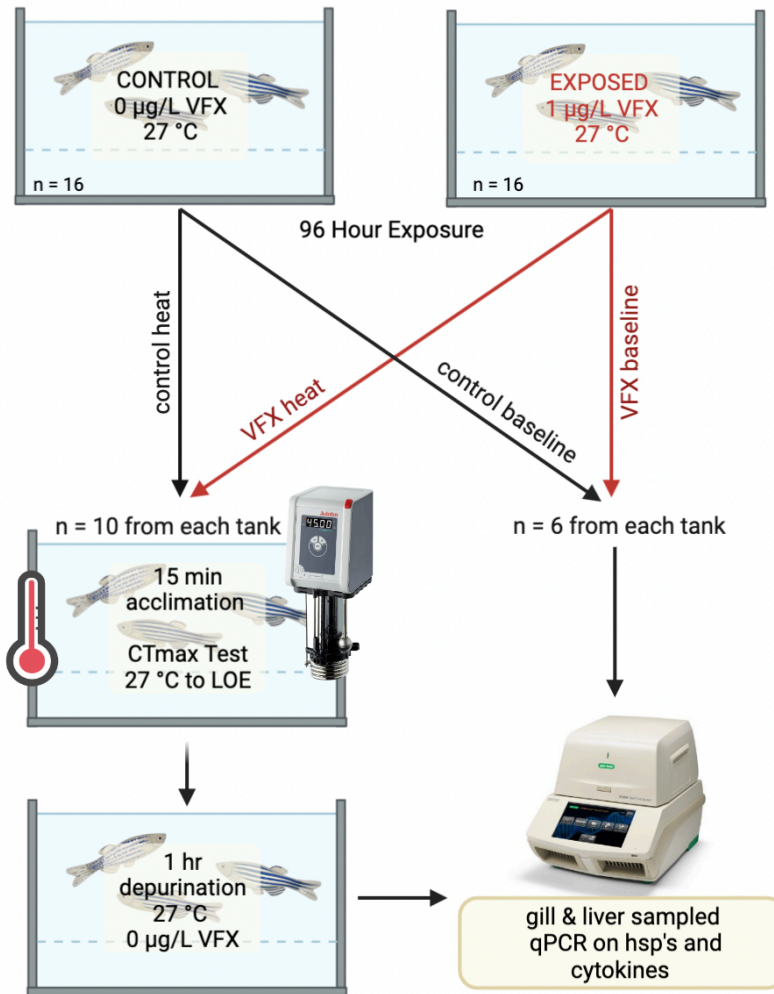

481  
482  
483  
484  
485  
486  
487  
488  
489  
490  
491  
492  
493

Figure 1.

494  
495  
496  
497

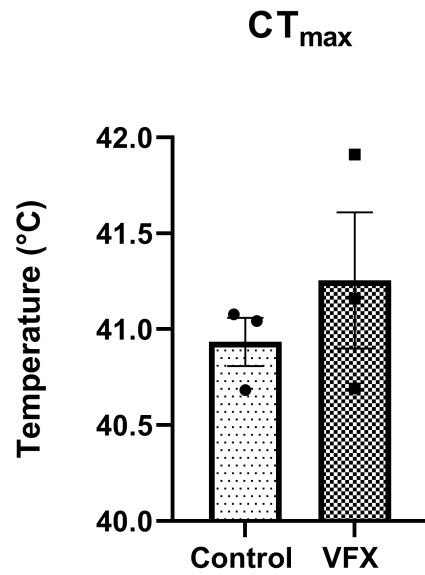

498  
499  
500  
501  
502  
503  
504  
505

**Figure 2.**

506  
507  
508  
509  
510  
511  
512  
513  
514  
515  
516  
517  
518  
519  
520  
521  
522  
523  
524  
525  
526  
527  
528  
529  
530  
531  
532  
533  
534  
535  
536  
537  
538  
539

**A**

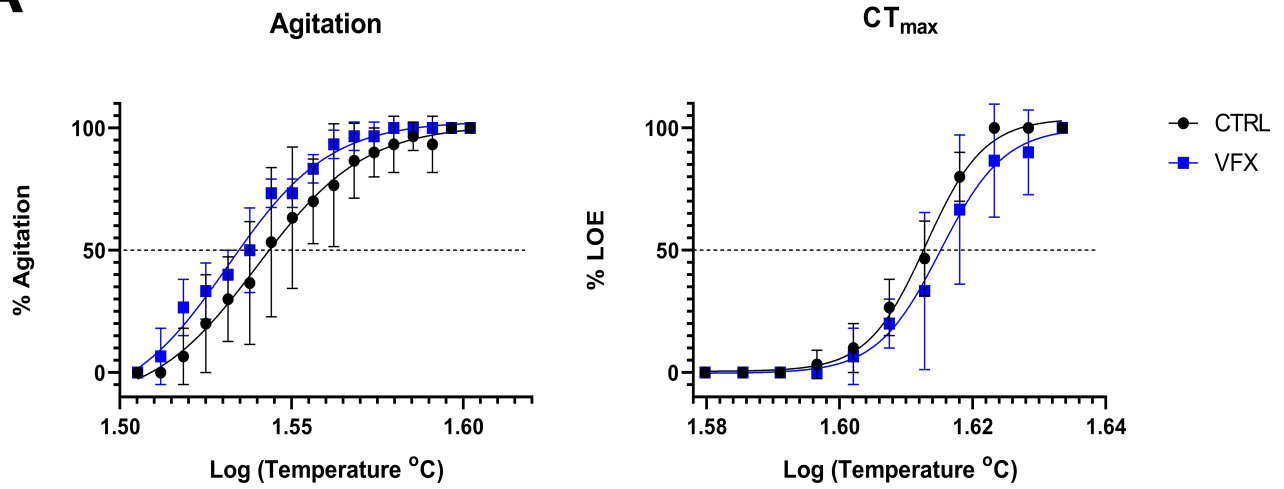

**B**

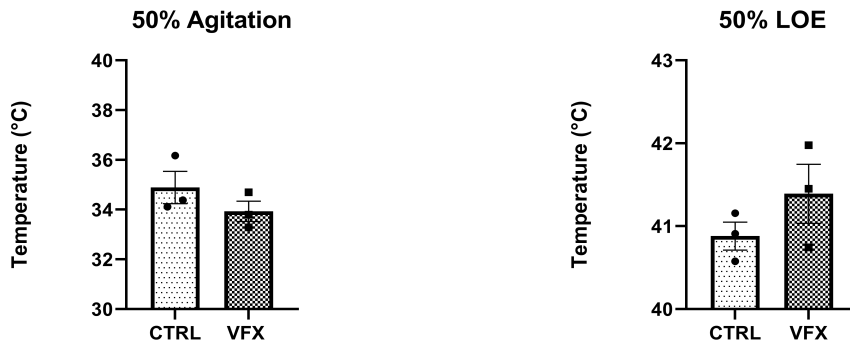

**Figure 3.**

540  
541  
542  
543  
544  
545  
546  
547  
548  
549  
550  
551  
552  
553  
554  
555  
556  
557  
558  
559  
560  
561  
562  
563  
564  
565  
566  
567  
568  
569  
570  
571  
572  
573

**A**

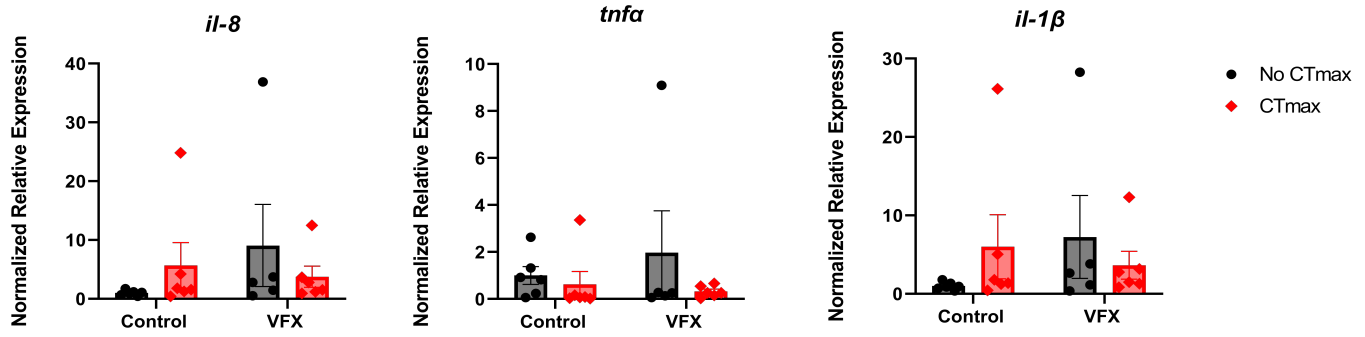

**B**

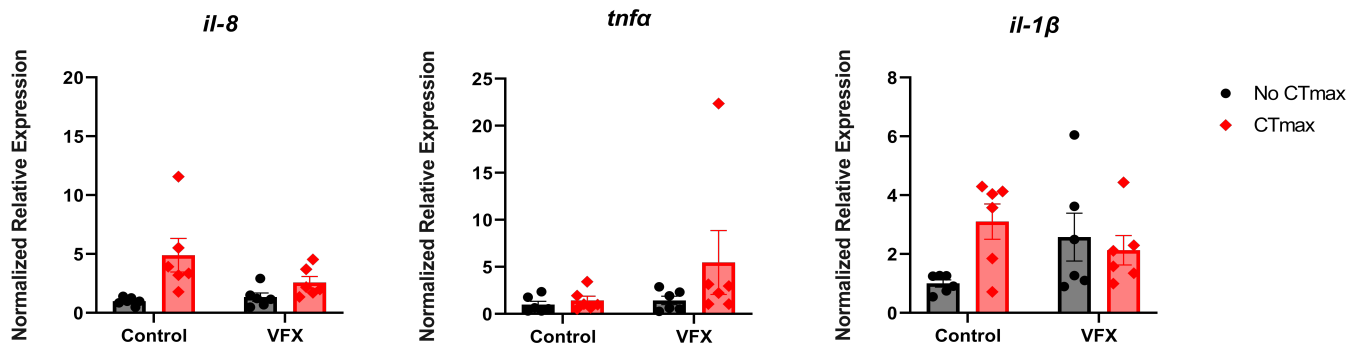

**Figure 4.**

574  
575  
576  
577  
578  
579  
580

**A**

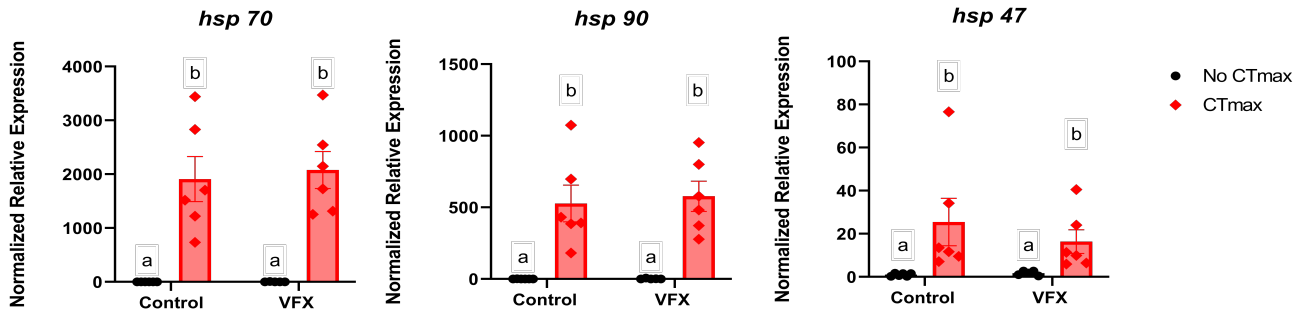

587 **B**

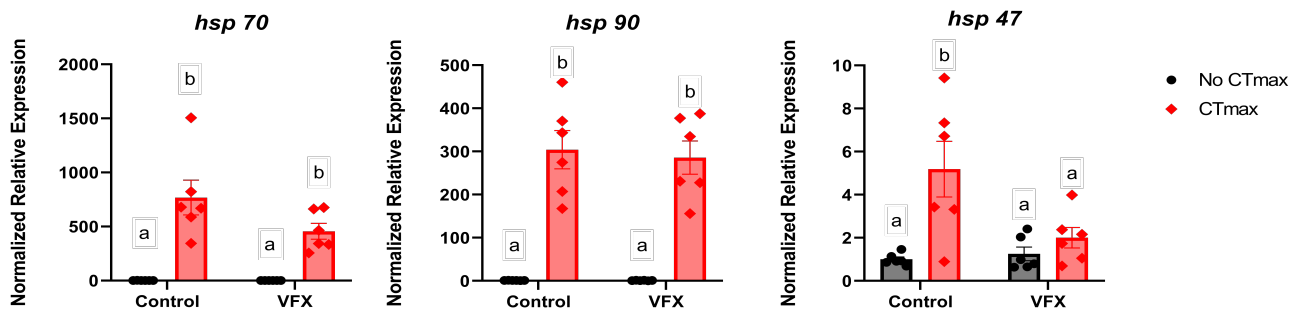

592  
593  
594  
595 **Figure 5.**



596

## 597 References

598

599 **Abdel-Gawad, F. Kh. and Khalil, W. K. B.** (2013). Modulation of stress related protein genes  
600 in the bass (*Epinephelus guaza*) caught from the Gulf of Suez, the Red Sea, Egypt.  
601 *Ecotoxicol. Environ. Saf.* **96**, 175–181.

602 **Alcorn, S. W., Murray, A. L. and Pascho, R. J.** (2002). Effects of rearing temperature on  
603 immune functions in sockeye salmon (*Oncorhynchus nerka*). *Fish Shellfish Immunol.* **12**,  
604 303–334.

605 **Arlos, M. J., Bragg, L. M., Parker, W. J. and Servos, M. R.** (2015). Distribution of selected  
606 antiandrogens and pharmaceuticals in a highly impacted watershed. *Water Res.* **72**, 40–  
607 50.

608 **Becker, C. D. and Genoway, R. G.** (1979). Evaluation of the critical thermal maximum for  
609 determining thermal tolerance of freshwater fish. *Environ. Biol. Fishes* **4**, 245–256.

610 **Best, C., Melnyk-Lamont, N., Gesto, M. and Vijayan, M. M.** (2014). Environmental levels of  
611 the antidepressant venlafaxine impact the metabolic capacity of rainbow trout. *Aquat.*  
612 *Toxicol.* **155**, 190–198.

613 **Bisesi, J. H., Bridges, W. and Klaine, S. J.** (2014). Effects of the antidepressant venlafaxine on  
614 fish brain serotonin and predation behavior. *Aquat. Toxicol.* **148**, 130–138.

615 **Cairns, J., Heath, A. G. and Parker, B. C.** (1975). The effects of temperature upon the toxicity  
616 of chemicals to aquatic organisms. *Hydrobiologia* **47**, 135–171.

617 **Commins, S. P., Borish, L. and Steinke, J. W.** (2010). Immunologic messenger molecules:  
618 cytokines, interferons, and chemokines. *J. Allergy Clin. Immunol.* **125**, S53–S72.

619 **Cortés, R., Teles, M., Trídico, R., Acerete, L. and Tort, L.** (2013). Effects of cortisol  
620 administered through slow-release implants on innate immune responses in rainbow trout  
621 (*Oncorhynchus mykiss*). *Int. J. Genomics* **2013**, 1–7.

622 **Daughton, C. G. and Ternes, T. A.** (1999). Pharmaceuticals and personal care products in the  
623 environment: agents of subtle change? *Environ. Health Perspect.* **107**, 907–938.

624 **Deutsch, C. A., Tewksbury, J. J., Huey, R. B., Sheldon, K. S., Ghalambor, C. K., Haak, D.  
625 C. and Martin, P. R.** (2008). Impacts of climate warming on terrestrial ectotherms  
626 across latitude. *Proc. Natl. Acad. Sci.* **105**, 6668–6672.

627 **Dominguez, M., Takemura, A., Tsuchiya, M. and Nakamura, S.** (2004). Impact of different  
628 environmental factors on the circulating immunoglobulin levels in the Nile tilapia,  
629 *Oreochromis niloticus*. *Aquaculture* **241**, 491–500.

630 **Ebele, A. J., Abou-Elwafa Abdallah, M. and Harrad, S.** (2017). Pharmaceuticals and personal  
631 care products (PPCPs) in the freshwater aquatic environment. *Emerg. Contam.* **3**, 1–16.

- 632 **Environment Canada ed.** (2001). *The state of municipal wastewater effluents in Canada*.  
633 Ottawa: Environment Canada.
- 634 **Fangue, N. A., Osborne, E. J., Todgham, A. E. and Schulte, P. M.** (2011). The onset  
635 temperature of the heat-shock response and whole-organism thermal tolerance are tightly  
636 correlated in both laboratory-acclimated and field-acclimatized tidepool sculpins  
637 (*Oligocottus maculosus*). *Physiol. Biochem. Zool.* **84**, 341–352.
- 638 **Ficke, A. D., Myrick, C. A. and Hansen, L. J.** (2007). Potential impacts of global climate  
639 change on freshwater fisheries. *Rev. Fish Biol. Fish.* **17**, 581–613.
- 640 **Galus, M., Kirischian, N., Higgins, S., Purdy, J., Chow, J., Ranganarajan, S., Li, H.,**  
641 **Metcalf, C. and Wilson, J. Y.** (2013). Chronic, low concentration exposure to  
642 pharmaceuticals impacts multiple organ systems in zebrafish. *Aquat. Toxicol.* **132–133**,  
643 200–211.
- 644 **Gauvreau, N. L., Bragg, L. M., Dhiyebi, H. A., Servos, M. R. and Craig, P. M.** (2022).  
645 Impacts on antioxidative enzymes and transcripts in darter (*Etheostoma* spp.) brains in  
646 the Grand River exposed to wastewater effluent. *Comp. Biochem. Physiol. Part C*  
647 *Toxicol. Pharmacol.* **258**, 109381.
- 648 **Hajhashemi, V., Minaiyan, M., Banafshe, H. R., Mesdaghinia, A. and Abed, A.** (2015). The  
649 anti-inflammatory effects of venlafaxine in the rat model of carrageenan-induced paw  
650 edema. *Iran. J. Basic Med. Sci.* **18**, 654–658.
- 651 **Hochachka, P. W. and Somero, G. N.** (2002). *Biochemical adaptation: mechanism and process*  
652 *in physiological evolution*. Oxford, UK: Oxford University Press.
- 653 **Hodgson, R., Bragg, L., Dhiyebi, H. A., Servos, M. R. and Craig, P. M.** (2020). Impacts on  
654 metabolism and gill physiology of darter species (*Etheostoma* spp.) that are attributed to  
655 wastewater effluent in the Grand River. *Appl. Sci.* **10**, 8364.
- 656 **Hoeger, B., Köllner, B., Dietrich, D. R. and Hitzfeld, B.** (2005). Water-borne diclofenac  
657 affects kidney and gill integrity and selected immune parameters in brown trout (*Salmo*  
658 *trutta f. fario*). *Aquat. Toxicol.* **75**, 53–64.
- 659 **Ikert, H. and Craig, P. M.** (2020). Chronic exposure to venlafaxine and increased water  
660 temperature reversibly alters microRNA in zebrafish gonads (*Danio rerio*). *Comp.*  
661 *Biochem. Physiol. Part D Genomics Proteomics* **33**, 100634.
- 662 **Iwama, G. K., Vijayan, M. M., Forsyth, R. B. and Ackerman, P. A.** (1999). Heat shock  
663 proteins and physiological Stress in Fish. *Am. Zool.* **39**, 901–909.
- 664 **Jayasundara, N., Fernando, P. W., Osterberg, J. S., Cammen, K. M., Schultz, T. F. and Di**  
665 **Giulio, R. T.** (2017). Cost of tolerance: physiological consequences of evolved resistance  
666 to inhabit a polluted environment in teleost fish *Fundulus heteroclitus*. *Environ. Sci.*  
667 *Technol.* **51**, 8763–8772.

- 668 **Le Morvan, C., Clerton, P., Deschaux, P. and Troutaud, D.** (1997). Effects of environmental  
669 temperature on macrophage activities in carp. *Fish Shellfish Immunol.* **7**, 209–212.
- 670 **Lele, Z., Engel, S. and Krone, P. H.** (1997). hsp47 and hsp70 gene expression is differentially  
671 regulated in a stress- and tissue-specific manner in zebrafish embryos. *Dev. Genet.* **21**,  
672 123–133.
- 673 **Lindquist, S. and Craig, E. A.** (1988). The heat-shock proteins. *Annu. Rev. Genet.* **22**, 631–677.
- 674 **Luu, I., Ikert, H. and Craig, P. M.** (2021). Chronic exposure to anthropogenic and climate  
675 related stressors alters transcriptional responses in the liver of zebrafish (*Danio rerio*)  
676 across multiple generations. *Comp. Biochem. Physiol. Part C Toxicol. Pharmacol.* **240**,  
677 108918.
- 678 **Manzon, L. A., Zak, M. A., Agee, M., Boreham, D. R., Wilson, J. Y., Somers, C. M. and**  
679 **Manzon, R. G.** (2022). Thermal acclimation alters both basal heat shock protein gene  
680 expression and the heat shock response in juvenile lake whitefish (*Coregonus*  
681 *clupeaformis*). *J. Therm. Biol.* **104**, 103185.
- 682 **Maulvault, A. L., Santos, L. H. M. L. M., Camacho, C., Anacleto, P., Barbosa, V., Alves, R.,**  
683 **Pousão Ferreira, P., Serra-Compte, A., Barceló, D., Rodriguez-Mozaz, S., et al.**  
684 (2018). Antidepressants in a changing ocean: venlafaxine uptake and elimination in  
685 juvenile fish (*Argyrosomus regius*) exposed to warming and acidification conditions.  
686 *Chemosphere* **209**, 286–297.
- 687 **Maulvault, A. L., Camacho, C., Barbosa, V., Alves, R., Anacleto, P., Pousão-Ferreira, P.,**  
688 **Rosa, R., Marques, A. and Diniz, M. S.** (2019). Living in a multi-stressors  
689 environment: an integrated biomarker approach to assess the ecotoxicological response of  
690 meagre (*Argyrosomus regius*) to venlafaxine, warming and acidification. *Environ. Res.*  
691 **169**, 7–25.
- 692 **McDonnell, L. H. and Chapman, L. J.** (2015). At the edge of the thermal window: effects of  
693 elevated temperature on the resting metabolism, hypoxia tolerance and upper critical  
694 thermal limit of a widespread African cichlid. *Conserv. Physiol.* **3**, cov050.
- 695 **Mehdi, H., Dickson, F. H., Bragg, L. M., Servos, M. R. and Craig, P. M.** (2018). Impacts of  
696 wastewater treatment plant effluent on energetics and stress response of rainbow darter  
697 (*Etheostoma caeruleum*) in the Grand River watershed. *Comp. Biochem. Physiol. B*  
698 *Biochem. Mol. Biol.* **224**, 270–279.
- 699 **Mehdi, H., Bragg, L. M., Servos, M. R. and Craig, P. M.** (2019). Multiple stressors in the  
700 environment: the effects of exposure to an antidepressant (venlafaxine) and increased  
701 temperature on zebrafish metabolism. *Front. Physiol.* **10**, 1431.
- 702 **Metcalfe, C. D., Chu, S., Judt, C., Li, H., Oakes, K. D., Servos, M. R. and Andrews, D. M.**  
703 (2010). Antidepressants and their metabolites in municipal wastewater, and downstream  
704 exposure in an urban watershed. *Environ. Toxicol. Chem.* **29**, 79–89.

- 705 **Mitra, T., Mahanty, A., Ganguly, S., Purohit, G. K., Mohanty, S., Parida, P. K., Behera, P.**  
706 **R., Raman, R. K. and Mohanty, B. P.** (2018). Expression patterns of heat shock protein  
707 genes in Rita rita from natural riverine habitat as biomarker response against  
708 environmental pollution. *Chemosphere* **211**, 535–546.
- 709 **Mohajerani, A., Bakaric, J. and Jeffrey-Bailey, T.** (2017). The urban heat island effect, its  
710 causes, and mitigation, with reference to the thermal properties of asphalt concrete. *J.*  
711 *Environ. Manage.* **197**, 522–538.
- 712 **Morash, A. J., Speers-Roesch, B., Andrew, S. and Currie, S.** (2021). The physiological ups  
713 and downs of thermal variability in temperate freshwater ecosystems. *J. Fish Biol.* **98**,  
714 1524–1535.
- 715 **Nikel, K. E., McCallum, E. S., Mehdi, H., Du, S. N. N., Bowman, J. E., Midwood, J. D.,**  
716 **Scott, G. R. and Balshine, S.** (2021). Fish living near two wastewater treatment plants  
717 have unaltered thermal tolerance but show changes in organ and tissue traits. *J. Gt. Lakes*  
718 *Res.* **47**, 522–533.
- 719 **Op de Beeck, L., Verheyen, J. and Stoks, R.** (2017). Integrating both interaction pathways  
720 between warming and pesticide exposure on upper thermal tolerance in high- and low-  
721 latitude populations of an aquatic insect. *Environ. Pollut.* **224**, 714–721.
- 722 **Painter, M. M., Buerkley, M. A., Julius, M. L., Vajda, A. M., Norris, D. O., Barber, L. B.,**  
723 **Furlong, E. T., Schultz, M. M. and Schoenfuss, H. L.** (2009). Antidepressants at  
724 environmentally relevant concentrations affect predator avoidance behavior of larval  
725 fathead minnows (*Pimephales promelas*). *Environ. Toxicol. Chem.* **28**, 2677.
- 726 **Perezcasanova, J., Rise, M., Dixon, B., Afonso, L., Hall, J., Johnson, S. and Gamperl, A.**  
727 (2008). The immune and stress responses of Atlantic cod to long-term increases in water  
728 temperature. *Fish Shellfish Immunol.* **24**, 600–609.
- 729 **Petrovsky, N.** (2001). Towards a unified model of neuroendocrine–immune interaction.  
730 *Immunol. Cell Biol.* **79**, 350–357.
- 731 **Poesch, M. S., Chavarie, L., Chu, C., Pandit, S. N. and Tonn, W.** (2016). Climate change  
732 impacts on freshwater fishes: a Canadian perspective. *Fisheries* **41**, 385–391.
- 733 **Polinski, M., Bridle, A. and Nowak, B.** (2013). Temperature-induced transcription of  
734 inflammatory mediators and the influence of Hsp70 following LPS stimulation of  
735 southern bluefin tuna peripheral blood leukocytes and kidney homogenates. *Fish*  
736 *Shellfish Immunol.* **34**, 1147–1157.
- 737 **Roberts, R. J., Agius, C., Saliba, C., Bossier, P. and Sung, Y. Y.** (2010). Heat shock proteins  
738 (chaperones) in fish and shellfish and their potential role in relation to fish health: a  
739 review: heat shock proteins in fish and shellfish. *J. Fish Dis.* **33**, 789–801.
- 740 **Schultz, M. M., Painter, M. M., Bartell, S. E., Logue, A., Furlong, E. T., Werner, S. L. and**  
741 **Schoenfuss, H. L.** (2011). Selective uptake and biological consequences of

- 742 environmentally relevant antidepressant pharmaceutical exposures on male fathead  
743 minnows. *Aquat. Toxicol.* **104**, 38–47.
- 744 **Semple, S. L. and Dixon, B.** (2020). Salmonid Antibacterial Immunity: An Aquaculture  
745 Perspective. *Biology* **9**, 331.
- 746 **Seneviratne, S. I., Donat, M. G., Mueller, B. and Alexander, L. V.** (2014). No pause in the  
747 increase of hot temperature extremes. *Nat. Clim. Change* **4**, 161–163.
- 748 **Singh, I. S., Gupta, A., Nagarsekar, A., Cooper, Z., Manka, C., Hester, L., Benjamin, I. J.,  
749 He, J. and Hasday, J. D.** (2008). Heat shock co-activates interleukin-8 transcription. *Am.  
750 J. Respir. Cell Mol. Biol.* **39**, 235–242.
- 751 **Somers, K. A., Bernhardt, E. S., Grace, J. B., Hassett, B. A., Sudduth, E. B., Wang, S. and  
752 Urban, D. L.** (2013). Streams in the urban heat island: spatial and temporal variability in  
753 temperature. *Freshw. Sci.* **32**, 309–326.
- 754 **Stillman, J. H.** (2019). Heat waves, the new normal: summertime temperature extremes will  
755 impact animals, ecosystems, and human communities. *Physiology* **34**, 86–100.
- 756 **Tort, L.** (2011). Stress and immune modulation in fish. *Dev. Comp. Immunol.* **35**, 1366–1375.
- 757 **Tynan, R. J., Weidenhofer, J., Hinwood, M., Cairns, M. J., Day, T. A. and Walker, F. R.**  
758 (2012). A comparative examination of the anti-inflammatory effects of SSRI and SNRI  
759 antidepressants on LPS stimulated microglia. *Brain. Behav. Immun.* **26**, 469–479.
- 760 **Uribe, C., Folch, H., Enriquez, R. and Moran, G.** (2011). Innate and adaptive immunity in  
761 teleost fish: a review. *Veterinárni Medicina* **56**, 486–503.
- 762 **Xing, H., Liu, T., Zhang, Z., Wang, X. and Xu, S.** (2015). Acute and subchronic toxic effects  
763 of atrazine and chlorpyrifos on common carp (*Cyprinus carpio L.*): immunotoxicity  
764 assessments. *Fish Shellfish Immunol.* **45**, 327–333.
- 765 **Yu, J., Roh, S., Lee, J.-S., Yang, B.-H., Choi, M. R., Chai, Y. G. and Kim, S. H.** (2010). The  
766 effects of venlafaxine and dexamethasone on the expression of Hsp70 in rat C6 glioma  
767 cells. *Psychiatry Investig.* **7**, 43.
- 768 **Zhang, C.-N., Tian, H.-Y., Li, X.-F., Zhu, J., Cai, D.-S., Xu, C., Wang, F., Zhang, D.-D. and  
769 Liu, W.-B.** (2014). The effects of fructooligosaccharide on the immune response,  
770 antioxidant capability and HSP70 and HSP90 expressions in blunt snout bream  
771 (*Megalobrama amblycephala Yih*) under high heat stress. *Aquaculture* **433**, 458–466.
- 772 **Zhang, N., Liu, X., Pan, L., Zhou, X., Zhao, L., Mou, X., Zhou, H., Liu, J. and Wang, X.**  
773 (2021). Evaluation of ibuprofen contamination in local urban rivers and its effects on  
774 immune parameters of juvenile grass carp. *Fish Physiol. Biochem.* **47**, 1405–1413.
- 775 **Zizza, M., Di Lorenzo, M., Laforgia, V., Furia, E., Sindona, G., Canonaco, M. and Facciolo,  
776 R. M.** (2017). HSP90 and pCREB alterations are linked to mancozeb-dependent

777 behavioral and neurodegenerative effects in a marine teleost. *Toxicol. Appl. Pharmacol.*  
778 **323**, 26–35.

779 **Zou, J. and Secombes, C.** (2016). The function of fish cytokines. *Biology* **5**, 23.

780
